1 **Title:** Rare Microbial Taxa Emerge When Communities Collide: Freshwater and Marine  
2 Microbiome Responses to Experimental Seawater Intrusion

3

4 Jennifer D. Rocca<sup>1</sup>, Marie Simonin<sup>1,2</sup>, Justin P. Wright<sup>1,3</sup>, Alex Washburne<sup>4</sup>, Emily Bernhardt<sup>1,3</sup>

5 <sup>1</sup>Department of Biology, Duke University, Durham, NC, United States

6 <sup>2</sup>IRD, Cirad, University of Montpellier, IPME, Montpellier, France

7 <sup>3</sup>Nicholas School of the Environment, Duke University, Durham, NC, United States

8 <sup>4</sup>Department of Microbiology and Immunology, Montana State University, Bozeman, MT, United States

9

10 **Running Title:** Rare Taxa Emerge during Community Coalescence

11 **Keywords:** 16S rRNA, biotic interactions, community coalescence, competition, environmental filtering,  
12 mass effects, mutualism, rare biosphere, salt stress, phylofactorization.

13

#### 14 **Authorship**

15 JR, MS, EB, and JW conceived of the project. JR and MS set up and harvested the incubation. JR  
16 extracted and processed the sequence data, and MS and AW contributed to the data analysis. All  
17 authors contributed to equally to writing the manuscript.

18

#### 19 **Conflict of Interest**

20 The contributors declare no conflict(s) of interest.

21

#### 22 **Corresponding Author**

23 Jennifer D. Rocca

24 Biology Department, Duke University

25 Durham, NC 27708

26 Email: [jenny.rocca@gmail.com](mailto:jenny.rocca@gmail.com)

27 Phone: 001-919-684-6556

28 **Abstract**

29 Whole microbial communities regularly merge with one another, often in tandem with their environments,  
30 in a process called community coalescence. Such events allow us to address a central question in  
31 ecology – what processes shape community assembly. We used a reciprocal transplant and mixing  
32 experiment to directly and independently unravel the effects of environmental filtering and biotic  
33 interactions on microbiome success when freshwater and marine communities coalesce. The brackish  
34 treatment and community mixing resulted in strong convergence of microbiome structure and function  
35 toward the marine. Brackish exposure imposed a 96% taxa loss from freshwater and 66% loss from  
36 marine microbiomes, which was somewhat counterbalanced by the emergence of tolerant rare taxa.  
37 Community mixing further resulted in 29% and 49% loss from biotic interactions between freshwater  
38 and marine microbiomes, offset somewhat by mutualistically-assisted rare microbial taxa. Our study  
39 emphasizes the importance of the rare biosphere as a critical component of community resilience.

40 **Main Text**

41 **INTRODUCTION**

42 A fundamental goal in ecology is to determine the distribution and abundance of species and  
43 the mechanisms controlling this distribution. This central objective is particularly challenging in microbial  
44 ecology because of the immense diversity, brief lifespan, and microscopic size of microorganisms. Many  
45 studies examine organismal distributions along environmental gradients to shed light on the natural  
46 history of species (Whittaker 1965) and microbial ecologists also use this concept to understand the  
47 natural history of microorganisms at biogeographical scales (Fierer and Jackson 2006) and along  
48 elevational (Bryant *et al.* 2008; Yang *et al.* 2014; Siles and Margesin 2016), precipitation (Angel *et al.*  
49 2009; Hawkes *et al.* 2017) and salinity (Herlemann *et al.* 2011; Herlemann *et al.* 2016) gradients.  
50 However, distinguishing between environmental tolerance or competitive abilities for microorganisms  
51 and determining their fundamental niche is difficult to assess with just distribution information.  
52 Determining the relative importance of environmental filtering and biotic interactions in structuring extant  
53 communities is difficult as both processes operate concurrently (Vellend 2010; Goberna *et al.* 2014;  
54 Cadotte and Tucker 2017).

55 Quantifying the influence of these assembly filters is unique for microbial communities, which  
56 typically migrate in the aggregate and in tandem with their environment. Thus 'habitat patches' move  
57 along with an entire assemblage of organisms. In metacommunity ecology, such collective exchanges  
58 are referred to as mass effects (Leibold *et al.* 2004, Souffreau *et al.* 2014, Comte *et al.* 2017). When  
59 previously distinct communities combine along with their respective environments, the reassembly of  
60 the novel community is termed 'community coalescence' (Webb 1976, Livingston *et al.* 2013, Rillig *et al.*  
61 2015, Rillig & Mansour 2017). Microbial community coalescence occurs every time a leaf falls to the  
62 ground, a soil particle is blown into a new landscape, or two bodies of water mix. Despite the ubiquity of  
63 microbial community coalescence, the formal recognition of this concept is fairly recent in microbial  
64 ecology (Rillig *et al.* 2017; Mansour *et al.* 2018). In fact, Mansour *et al.* (2018) suggest that many  
65 experimental studies with microbial communities are unacknowledged community coalescence  
66 experiments.

67 Community coalescence is not only an interesting phenomenon, it also provides immense  
68 opportunities to leverage experiments to learn about *how* individual microorganisms respond and  
69 microbial communities assemble in response to the merging event. To develop the natural history of

70 microorganisms, we need to understand how both environmental and biological filters ultimately  
71 determine who persists and who does not when communities collide. To address this fundamental  
72 ecological question, we introduce a new methodological framework (Fig. 1) to directly measure the  
73 independent and combined effects of environmental and biotic filters (*sensu* Vellend 2010) that structure  
74 the distribution and abundance of microbial taxa.

75         We used a microcosm experiment to examine how microbial communities reassemble following  
76 the blending of media and microbial communities between freshwater and marine environments to  
77 simulate seawater intrusion - a mixing event that occurs along all coastal margins. Our experimentally  
78 created coalescence event (Fig. 1) allowed us to ask: Q1) how do microbial communities from distinct  
79 environments respond to merging? Q2) what is the relative role of environmental filtering and biotic  
80 interactions in structuring this newly united community? Q3) are more closely related taxa more likely to  
81 respond similarly to each filter? and Q4) what are the resulting consequences for microbial community  
82 function?

83         Seawater intrusion into freshwater systems is a prevalent feature of tidal environments and is  
84 increasing in frequency and extent as drought, irrigation and climate change are all increasing the inland  
85 and upland movement of seawater into freshwater habitats (Weston *et al.* 2006, Herbert *et al.* 2015).  
86 The multivariate chemical transition to brackish water is well studied, and salinity is a well-documented  
87 environmental stressor (Lozupone and Knight 2007), imposing strong evolutionary selection on  
88 organisms (Paver *et al.* 2018). When freshwaters come into contact and blend with seawater, we  
89 observe dramatic decreases in organic carbon content due to complexation with salts, increased pH,  
90 and nutrient availability along with increases in salinity (Craft *et al.* 2009, Barlow & Reichard 2010, Ardón  
91 *et al.* 2016a). Dynamic pulses of salty, oligotrophic marine water mixing with relatively mesotrophic  
92 freshwater habitats results in brackish conditions, novel to either endpoint microbial community. The  
93 microbial consortia derived from either endpoint habitat are well adapted to their respective  
94 environmental conditions (Canfora *et al.* 2014, Herlemann *et al.* 2016), and exposure to brackish water  
95 imposes substantial stress on members of each endpoint community, particularly the freshwater  
96 sediment microbial communities (Baldwin *et al.* 2006, Jackson and Vallaire 2009, Neubauer *et al.* 2013,) and  
97 water column microbial taxa (Burke and Baird 1931, Nielsen *et al.* 2003, Ewert and Deming 2013).  
98 While we expect freshwater microorganisms to more stressed by the salt exposure of the brackish  
99 conditions (Edmonds *et al.* 2009, Herbert *et al.* 2015), little is known about the outcome of blending

100 these distinct communities. We expect a substantial turnover of each microbiome in response to the  
101 strong environmental filter imposed by the brackish exposure (Paver *et al.* 2018), but less is known  
102 about the community responses to novel biotic interactions that might arise through community blending.  
103 Though marine microbial taxa are more stress tolerant to the wide range of salinity, they may not fare  
104 well if the freshwater microbial taxa are better competitors (Grimes *et al.* 1977). Do the existing  
105 communities have a great phenotypic plasticity or can the rare biosphere aid in the resilience to drastic  
106 environmental changes and community introductions?

107 Our experimental design allows us to differentiate amongst four potential outcomes of microbial  
108 community coalescence (Fig. 1, top panel). Beginning with the assumption that our starting endmember  
109 communities are distinct, we expect that the community resulting from their exposure to the mixed  
110 environment and to the community merger would follow one of four possible trajectories of the final  
111 community composition (Fig. 1, top panel): A) intermediates between the two home conditions due to  
112 species sorting hinging on the environment, B) stratified yet similar to their initial inocula due to  
113 symmetric community resistance; or C) converge towards the assemblage observed in only one of the  
114 two environments due to strong asymmetric environmental selection or asymmetric community  
115 resistance. Alternatively, a final outcome (D) is that the coalescence conditions result in highly variable  
116 emergent communities via stochastic responses. In the scenario where the communities converge  
117 towards a single endmember (C), our methodological framework allows us to directly distinguish  
118 between environmental and biotic controls in driving this response (Fig. 1, bottom panel).

119 Our integrative research approach allows us the opportunity to add a natural history perspective  
120 to the study of microbial ecology. Habitat transplants will apply an environmental filter to identify  
121 generalist vs specialist microbial taxa. Community coalescence allows us to identify strong vs. weak  
122 competitors and common associations amongst taxa.

123

## 124 **MATERIALS and METHODS**

### 125 Field sample collection and aquatic endmember characterization

126 The two endmember sources for this microcosm experiment are located in coastal North Carolina, USA  
127 (Table 1). The Freshwater Wetland site, hereafter “Freshwater” site, is a blackwater wetland ecosystem  
128 located within the Timberlake Wetland Restoration Project in Tyrrell Co., NC, 35°53'46.4"N,  
129 76°09'51.4"W (Ardón *et al.* 2016b), exposed to episodic or storm-triggered flows following rain or coastal

130 storm systems. In contrast, the Coastal Marine site, hereafter “Marine” site, located at the northern end  
131 of the Cape Hatteras National Seashore (Dare Co., NC, 35°49'57.4"N, 75°33'25.7"W) with persistent  
132 water turbulence.

133 The Freshwater and Marine endmember sites were selected for their close proximity (64 km)  
134 and even latitude, while maximizing the potential range of habitats involved in seawater intrusion. Both  
135 sites are not significantly impacted by human activity, and the Freshwater site had no recent seawater  
136 exposure. Additionally, the water samples were specifically collected at the end of a seasonal period  
137 where recent seawater intrusion was least likely. We acknowledge that these sites do not represent true  
138 potential locations of seawater intrusion, as the mixing occurs gradually across the 64 km gradient.  
139 However, the sites are true endmembers, with past seawater intrusion coalescence events. In June  
140 2016, we collected 80 L of surface water from each site into sterile carboys, stored at the average  
141 temperature (23 °C) of the two sites at time of collection. Within 12 hours, each sample was filtered  
142 through axenic 1 mm mesh to remove macroorganisms and debris. Each sample was subsampled for  
143 salinity, pH, and dissolved organic carbon. After filtration, the two endmember water samples were  
144 halved to generate: (a) the microbe-free environments and (b) microbial inocula (Fig. 1).

#### 145 Microcosm incubation setup

146 We set up a laboratory incubation, exposing three inocula isolated from each endmember samples  
147 (Freshwater, Marine, and a 1:1 mixture of Freshwater-Marine, hereafter “Coalescence”), into three  
148 axenic aquatic environments (Freshwater, Marine, and a 1:1 mixture of the endmember environments,  
149 hereafter “Brackish”). We sterilized each water source by autoclaving at 121 °C / 20 PSI for 30 mins in  
150 covered acid-washed glassware. After cooling to room temperature, the autoclaving was repeated twice  
151 more to ensure that any microorganisms exiting dormancy were killed. Subsamples of each starting  
152 environment were streaked on Luria-Bertani agar plates to confirm sterility.

153 Intact microbial communities were isolated by concentrating cells off the remainder of the  
154 Freshwater and Marine samples. Two complementary concentrating methods were implemented to  
155 minimize biases imposed by either method. Half from each environment was gently centrifuged at 5,000  
156 RCF in 50 mL batches in round-bottom tubes to ensure maximal viability of the microbial assemblages  
157 (Pembrey *et al.* 1999, Peterson *et al.* 2012). In parallel, the remaining water samples were filtered over  
158 gamma-irradiated Pall Supor 0.2 µm nitrocellulose membranes (Millipore, New York, NY) in small  
159 batches to minimize fouling on the filter. For each inoculum, the filter-collected and centrifuged-collected

160 microbiomes were combined by resuspending in sterilized home. The Coalescence microbiome was  
161 made by mixing 1:1 subsamples of the Freshwater and Marine inocula.

162 The full experimental design consisted of 120 independent microcosms (850 mL inoculated with  
163 550  $\mu$ l), with an experimental replication of five, along with positive/negative controls (Suppl. Fig. 1).  
164 Here we present a subset (n=25 microcosms) of the full incubation with five treatment conditions:  
165 “Freshwater-Home”: Freshwater microbiome in Freshwater environment, “Marine-Home”: Marine  
166 microbiome in Marine environment, “Freshwater-Brackish” and “Marine-Brackish”: Freshwater (or  
167 Marine) microbiome in Brackish environment; and “Brackish-Coalescence”: a 1:1 blended microbiome  
168 in a 1:1 mixture of the endmember environments. We set up the microcosms into sterile glass Mason  
169 jars under UV-treated PCR-hood conditions. The positive control microcosms were used to correct for  
170 any experimental artifacts from inoculum and environment preparations, which did not vary significantly  
171 from the ‘home’ microcosms (Suppl. Fig. 2). Microcosms with sterile environments or sterile water with  
172 no added inocula were included as negative controls to confirm axenic conditions, and none had any  
173 detectable microbial growth or genetic material and will not be discussed further. The incubation ran for  
174 seven days in an environmental growth chamber (23 °C, 13.5 hr diurnal light regime, and PAR: 250-450  
175  $\mu$ mol m<sup>-2</sup>s<sup>-1</sup>) reflecting field conditions. Twice-daily, the microcosms were re-randomized to minimize  
176 potential biases from differential light and temperature across the chamber, and each microcosm was  
177 mixed by inverting.

#### 178 Microbial function

179 Microbial extracellular enzyme potential activity (hereafter enzyme activity) was measured in each  
180 microcosm at the end of the incubation. Enzyme activity for eight enzymes were measured from a 91-  
181 mL homogenized subsample of each microcosm following a protocol developed by Bell *et al.* (2013),  
182 here modified to handle water. The following enzymes were targeted with fluorescently labeled  
183 substrates to capture potential N, P, C, and S degradation activity:  $\alpha$ -1,4-glucosidase (AG), aryl-  
184 sulfatase (AS),  $\beta$ -1,4-glucosidase (BG),  $\beta$ -D-1,4-cellobiosidase (CB), L-leucine aminopeptidase (LAP),  
185  $\beta$ -1,4-N-acetylglucosaminidase (NAG), alkaline phosphatase (PHOS), and  $\beta$ -D-xylosidase (XYL). After  
186 three-hours at room temperature, the centrifuged supernatant for each sample was read (340/460 nm)  
187 on a FLUOstar Optima spectrophotometer (BMG Labtech, Cary, NC, USA) in black optical 96-well  
188 plates.

#### 189 DNA extraction & bacterial community analysis

190 After the incubation, a 250 mL subsample of each microcosm was filtered over gamma-irradiated Pall  
191 Supor 0.2  $\mu\text{m}$  nitrocellulose membranes (Millipore, New York, NY), and the filtrate was centrifuged at  
192 10,000 x g for one hour to pellet any remaining ultra-small microorganisms (Luef *et al.* 2015). The pellet  
193 and filter were combined and processed for genomic DNA using a MoBio PowerWater DNA Isolate Kit  
194 (MoBio, Vancouver, CA) modified by adding a heating step during cell lysis. Total genomic DNA was  
195 fluorometrically measured (Quant-iT dsDNA Assay Kit, ThermoScientific, Waltham, MA), and used as  
196 proxy for total microbial biomass (Baas *et al.* 2015, Nagler *et al.* 2018). The samples were amplified,  
197 targeting the V4 hypervariable region of the bacterial 16S rRNA gene (515-F/806-R, Caporaso *et al.*  
198 2011), and sequenced with Illumina MiSeq (PE 150bp; V2 chemistry) at the Environmental Sample  
199 Preparation and Sequencing Facility (ESPSF) at Argonne National Laboratory. Raw sequences are  
200 deposited into the NCBI Sequence Read Archive (SRA): [PRJNAXXXX](#).

201 ESPSF returned 25 million raw sequences, which we processed through Quantitative Insights  
202 Into Microbial Ecology 2 (Qiime2) pipeline (Bolyen *et al.* 2018) to remove low quality reads and putative  
203 chimera, and to denoise the sequences into exact sequence variants (SVs) with Dada2 (Callahan *et al.*  
204 2017). We aligned the representative sequences and assigned taxonomy using the Silva V132 (99%)  
205 curated reference alignment (Quast *et al.* 2013), and a phylogeny and improved alignment were  
206 simultaneously generated using the Practical Alignment using SATé and TrAnsitivity (PASTA) software  
207 (Mirarab *et al.* 2013). Eukaryotic, mitochondrial, and chloroplast contaminant sequences were removed.  
208 The SV table was rarefied to lowest sequence depth (17,500 sequences), and the final dataset  
209 contained 3389 unique SVs with 12,293,437 total reads.

### 210 Microbiome Structure & Function Profile

211 To bulk characterize the bacterial communities, alpha-diversity (Chao1) and Pielou's evenness were  
212 calculated on each sample. A Bray-Curtis dissimilarity matrix was created for the community dataset  
213 (and Euclidean for the enzyme dataset) to examine differences in community structure and in the  
214 functional profile among treatments, and to visualize these shifts using non-metric multidimensional  
215 scaling (NMDS). To test the hypothetical outcomes of community structure detailed in Fig. 1A, a non-  
216 parametric multivariate analysis of variance (per-MANOVA, Anderson 2001) was implemented to  
217 identify significant overall and between group shifts in community. The "adonis" function in the vegan R  
218 package (Version 3.3.1, Oksanen *et al.* 2017) was used to implement the perMANOVA by estimating  
219 correlation coefficients and corresponding p-values (permutations = 999) for the effect of each



220 treatment. Subsequent pairwise comparisons were performed using Adonis. The “procrustes” function  
221 (Jackson 1995) in Vegan was used to perform least-squares orthogonal mapping to determine  
222 correlations between two multivariate datasets. Here, procrustes (PROTEST) was used to determine  
223 correlations between bacterial community structure and microbial enzyme activities profile. Additionally,  
224 we visualized the responses of the most abundant microbial SVs (> 2%) using UPGMA clustering (Sokal  
225 & Michener 1958) to the environmental and microbiome mixing treatments. This subset of taxa was  
226 further identified for halotolerance using the LPSN database (Parte 2013) of known microbiological traits.  
227 Univariate data that violated assumptions of normal distribution and homoscedasticity were log-  
228 transformed, and assumptions were subsequently re-verified with Shapiro-Wilk and Levene’s tests and  
229 examination of Q-Q plots. We used one-way ANOVAs to test the significance of the treatments on  
230 microbiome diversity and enzyme activity, then *post-hoc* pairwise comparisons among the treatment  
231 combinations were performed using Tukey’s Honestly Significant Difference multiple means  
232 comparison.

### 233 Direct separation of contribution of local assembly mechanisms

234 To directly disentangle the influence of environmental filtering and novel biotic interactions, we  
235 compared specific experimental treatments (Fig. 1, bottom panel). To examine the environmental filter  
236 (Part 1), we compared ‘home’ microbiomes to the corresponding Brackish microbiomes (i.e. Freshwater-  
237 Home vs. Freshwater-Brackish or Marine-Home vs Marine-Brackish). To examine the impact of novel  
238 biotic interactions from community blending (Part 2), the Freshwater-Brackish and Marine-Brackish  
239 microbiomes were compared to the Brackish-Coalescence microbiomes. A new phylogenetic-based  
240 method – phylofactorization – was used to identify clades driving changes in community composition  
241 (Washburne *et al* 2017, 2019), based on a Holm’s sequentially rejective 5% cutoff for the family-wise  
242 error rate. The resultant phylofactor objects are available in the supplementary material.

243

## 244 **RESULTS**

### 245 Starting Conditions: Bacterial Community and Chemical Characterization.

246 Our two environments and initial microbial communities were distinct among the Freshwater and Marine  
247 endmembers (Table 1). Other than water temperature at the time of field collection, all other water  
248 chemistry properties varied substantially between our endmembers (Table 1). Electrical conductivity

249 was ~740-fold greater and pH was 3.8 units higher in the Marine sample, while the Freshwater  
250 environment had higher concentrations of both nutrients and dissolved organic matter (Table 1).

251 The Freshwater and Marine microbial communities were also distinct from one another.  
252 Microbial biomass (Table 1: 749 vs. 218 ng DNA/ $\mu$ L), alpha diversity (Fig. 2A: 328 vs. 253 observed  
253 SVs/microcosm) and evenness (Fig. 2A: 0.1 vs. 0.02) were significantly higher in the Freshwater  
254 microbial community. The two endmember microbiomes had minimal overlap in their community  
255 composition (Fig. 2B), with only 21 SVs (<1.4% of total SVs) representing 22% of the Fresh+Marine  
256 summed biomass (Suppl. Fig. 3). The Freshwater community was dominated by the families:  
257 *Acetobacteraceae*, *Paracaedibacteraceae*, *Beijerinckiaceae*, *Burkholderiaceae*; while the Marine  
258 microbiome was dominated by the families: *Alteromonadaceae*, *Rhodobacteraceae*, *Saprospiraceae*,  
259 *Spirosomaceae*, and *Vibrionaceae* (Fig. 3) with a single taxon – *Alteromonas* - dominating 9.7% of the  
260 Marine microbiome. The two communities contrasted in their functional potential as well, exhibiting  
261 distinct enzyme profiles, with the Freshwater microbiome producing significantly higher amounts in  
262 seven of the eight enzymes analyzed (Fig. 2C, Suppl. Fig. 4).

263

#### 264 Convergence towards Marine Bacterial Community During Coalescence

265 When the two axenic endmember water samples were combined to create our Brackish media, the  
266 resulting chemical properties were intermediate to the two endmembers. Substantial buffering led to the  
267 Brackish media having a pH closer to the endmember, but other chemical components, were essentially  
268 the average of the two contributing media (Table 1). The blending of the two communities into the  
269 Coalescence inoculum was also the average biomass of the two endmembers (Table 1).

270

271 *Environmental Filter*: Despite their higher diversity and biomass (Fig. 2A), the Freshwater microbial taxa  
272 did not fare well when added to the Brackish media in the absence of Marine community blending (i.e.  
273 Freshwater-Brackish treatment). Only 36 of the 967 total taxa initially sequenced from our Freshwater-  
274 Home microbiomes persisted following this environmental filter into Brackish media, although 169 taxa  
275 that were below our detection (i.e. rare taxa) in the initial inoculum were detected in the Brackish media  
276 (Fig. 4). We are confident that these taxa represent increases in abundance from the rare biosphere  
277 contained in the initial inoculum as we failed to detect any genomic DNA in our negative controls. Marine  
278 microbial taxa were more tolerant of the transfer into Brackish media, with 199 of the original 588 taxa

279 surviving. A large number of rare biosphere taxa emerged from Marine inoculum under Brackish  
280 conditions. We detected 393 taxa in our Marine-Brackish treatments that were not detected in the  
281 original Marine-Home microcosms. Consequently, the diversity of the Marine inoculum in Brackish  
282 media was equal to the starting inoculum (592 vs. 588), while there was a substantial loss of total  
283 richness for the Freshwater microbiome in Brackish media compared to the diversity of its initial inocula  
284 (205 vs 967) (Fig. 4). The community composition of the Marine-Brackish replicates was very similar to  
285 the Marine-Home, while the Freshwater-Brackish community shifted significantly in composition towards  
286 the Marine-Home relative to its initial Freshwater-Home composition (Fig. 2B). We detected more shared  
287 taxa between these environmentally filtered communities, with 65 taxa overlapping between  
288 Freshwater-Brackish and Marine-Brackish. For the low diversity Freshwater-Brackish replicates, these  
289 shared taxa represent more than 25% of the total diversity. These increased taxa include the following  
290 families, which were below detection limit in Freshwater-Home: *Alteromonadaceae*, *Oceanospirillaceae*,  
291 *Rhodobacteraceae*, and *Vibrionaceae* (Fig. 4). The enzymatic profile of each community followed similar  
292 trends, with the Marine-Home, Marine-Brackish and Freshwater-Brackish replicates having reduced  
293 enzyme activity (Suppl. Fig. 4) and more similar enzyme profiles relative to the Freshwater-Home  
294 enzyme profile (Fig. 2C).

295  
296 *Biotic Filter*: In contrast to the extreme loss of abundant taxa caused by environmental filtering, the  
297 addition of interacting taxa from the two endmember communities into our Brackish media ('Brackish-  
298 Coalescence') had a more limited effect on microbial richness. Of the 967 Freshwater taxa found in the  
299 initial Freshwater-Home treatment, 37 were detected in the Brackish-Coalescence treatment. This set  
300 overlapped entirely with the set of taxa that survived through the environmental filter, with the exception  
301 of a single taxa that disappeared in the Freshwater-Brackish treatment but increased in abundance in  
302 response to the addition of an interacting community assemblage. There were 145 Freshwater-derived  
303 taxa that survived the Brackish treatment but did not persist when in the presence of the new interacting  
304 microbiome (lost in the Brackish-Coalescence treatment). Of the 588 Marine taxa detected in the original  
305 Marine-Home treatment, 171 were detected in the Brackish-Coalescence treatment. This set of Marine  
306 survivors overlapped considerably with the list of taxa that were tolerant of the environmental filter (with  
307 143 taxa found in both taxa lists). There were 28 Marine-derived taxa who only persisted in Brackish  
308 media when also combined with the interacting microbiome (Brackish-Coalescence), and there were

309 302 Marine taxa that could survive the environmental filter (were found in Marine-Brackish treatments)  
310 but could not persist in the presence of the new blended microbiome (lost in the Brackish-Coalescence  
311 treatment).

312 We introduced at least 1528 taxa from both endmember inocula into the Brackish-Coalescence  
313 treatments (this is the sum of the distinct taxa derived from the two endmember communities). Given  
314 the rare biosphere constituents detected in our environmentally filtered treatments, we likely added a  
315 further 495 taxa, for a total taxa pool of >2000 microbial taxa. After coalescence, we detected only 472  
316 taxa in the Brackish-Coalescence treatment. While richness declined roughly to the level of the Marine-  
317 Home, evenness was intermediate between the two endmembers, reflecting a shift in the shape of the  
318 dominance diversity curve. Taxa loss was not symmetric: only 37 of the original Freshwater microbiomes  
319 were detected, while 171 Marine-derived microbial taxa survived. Ten of these 'surviving' taxa were in  
320 common, and all ten of these overlapping taxa were members of the set of 21 taxa found in both original  
321 endmember inocula. One quarter (n=126) of the taxa detected in the Brackish-Coalescence treatment  
322 were not observed in the Marine-Brackish or Freshwater-Brackish treatments and thus we do not know  
323 from which endmember community they were derived. These rare biosphere constituents increased in  
324 abundance as a result of interactions between the endmember microbiomes.

325 The composition of the Brackish-Coalescence community overlapped almost entirely with the  
326 Marine endmember community (Fig. 2B). Both the Marine endmember, the Marine-Brackish and the  
327 Brackish-Coalescence communities were dominated by *Alteromonas* (~50% of relative abundance)  
328 (Fig. 3). Taxa that dominated the Freshwater microbiome were lost (Fig. 3, Fig. 5).). The enzymatic  
329 response followed a similar trend: the enzymatic profile for the Brackish-Coalescence microcosms was  
330 indistinguishable from the Marine-Brackish and slightly different from the Marine-Home enzyme profile,  
331 while significantly different from the enzymes of both the Freshwater-Home and Freshwater-Brackish  
332 treatments (Fig. 2C).

### 333 *Phylogenetic response to Coalescence varies by End Member Community*

334 Taxa that were lost and gained from the Marine microbiome in response to environmental filter and to  
335 the biotic filter were closely related (Fig. 5). A sensitive taxon lost due to filtering was typically replaced  
336 by an increase in abundance of a tolerant sister taxa in the Marine microbiomes. In contrast, whole  
337 classes and orders of the Freshwater microbial community were lost and gained as a result of these two  
338 assembly filters. The phylofactorization of microbiomes exposed to the Brackish media identified nine

339 factors, forming six non-overlapping clades capturing a total of 548 species (average 91 species)  
340 showed significant changes in the probability of being detected in Brackish water. All but one of these  
341 factors show an increase probability of being present relative to other Freshwater microorganisms  
342 (Suppl. Fig. 5). In contrast, there were four overlapping Marine clades (from five identified factors) totally  
343 255 species (average 64 species) showing significant changes in detection probability with Brackish  
344 exposure (Suppl. Fig. 5).

345

## 346 **DISCUSSION**

347 Environmental filters and biotic interactions were both important in determining which Freshwater and  
348 Marine microorganisms survived under Brackish common garden conditions. When transplanted from  
349 their home environments into Brackish media, both Freshwater and Marine communities lost >70% of  
350 all detectable taxa in the initial inoculum and home conditions. This was somewhat counter balanced by  
351 the emergence of the rare biosphere of each microbiome, accounting for 66% of the Marine microbiome  
352 and 82% of the Freshwater microbiome in the Brackish environment. The rare biosphere emergence  
353 stabilized Marine microbial richness to just over 100% of original richness. In contrast, Freshwater  
354 microbiome richness in Brackish conditions was only 21% of original richness, despite rare biosphere  
355 emergence. This awakening of the rare biosphere during Brackish exposure supports Paver *et al.*  
356 (2018), who show that certain rare microbial taxa that may possess wider salinity tolerance ('crossing  
357 the salty divide') may also be uniquely adapted to proliferating in these new environmental conditions.  
358 The biotic filter also imposed taxonomic shifts for both communities when added in combination to the  
359 Brackish arena. Under this Brackish-Coalescence treatment, a further 70.7% of the initial Freshwater  
360 inocula and 51% of the Marine inocula were not detected. Taken together, these patterns of major loss  
361 of specialists and counter balancing of emerging rare taxa explain the community convergence on the  
362 Marine microbiome.

363         There were significant differences in the taxonomic richness response of these two communities  
364 to our coalescence experiment. While both endmember communities were significantly different from  
365 their coalescent counterparts, only the Freshwater community had a significant reduction in taxa  
366 richness as a result of environmental filtering (Fig. 2C). This suggests that the Marine microbiome is, on  
367 the whole, more capable of dealing with the intermediate Brackish conditions for two main reasons:  
368 resistance of at least a third of the community to a range of salinity and nutrients, and resilience due to

369 the high community buffering capacity of the Marine rare biosphere. The prevalence of Marine-derived  
370 rare Brackish tolerant taxa and consequential convergence towards the Marine microbiome is perhaps  
371 expected given the high physiological threshold of marine microbial taxa to a wide range of salinity (del  
372 Giorgio and Bouvier 2002, Wu *et al.* 2006, Herlemann *et al.* 2010). As we lose sensitive dominant taxa,  
373 we sample the rare biosphere more deeply. The rich 'microbial seed bank' buffers fluctuations in species  
374 richness (Lennon and Jones 2011, Jousset *et al.* 2017, Wang *et al.* 2017), which may help explain the  
375 limited functional change in this common garden experiment.

376         These two unique microbial communities show distinct phylogenetic responses to the  
377 environmental filters imposed by being transplanted into Brackish media. For our Freshwater  
378 community, whole clades turned over. We saw that several sensitive Freshwater clades were lost while  
379 multiple tolerant Freshwater clades become abundant enough to detect. In contrast, for our saltwater  
380 community the turnover was at a finer taxonomic resolution, with a loss and gain of sister taxa within  
381 clades. The composition of experimental replicates was remarkably similar, indicating that there are real  
382 differences in the ability of microbial taxa to survive transplant into altered salinities and that community  
383 composition responses are predictable. Community composition converged under Brackish conditions  
384 because for both endmember microbiomes there was a reservoir of tolerant rare taxa which increased  
385 in abundance when exposed to the intermediate environmental condition. The shift in composition  
386 towards the Marine microbiome resulted from a greater reservoir of tolerant taxa within that community.  
387 The evidence for this is both the compositional shift revealed through ordination and also the fact that  
388 the loss of initially detected taxa is not accompanied by a decline in species richness for the Marine  
389 microbiome.

390         From a fundamental science perspective, the immense contribution of the rare biosphere to the  
391 Brackish conditions is most fascinating and this rapid turnover of the community somewhat unique to  
392 microorganisms. With <2% of detectable overlap among the original microbiomes, the response to  
393 Brackish conditions converges the microbiomes to much higher taxonomic overlap, with the retention of  
394 the original overlapping taxa and immense emergence of the rare biosphere of each endmember  
395 community. This emergence of the microbial 'seedbank' and the dampened response to aggregate  
396 microbial function is an excellent example of microbial community resilience, where the rare biosphere  
397 plays a pivotal role in ecological rescue.

398 From an applied microbiology perspective and the natural history of microorganisms, learning  
399 which taxa are lost to environmental and biotic filtering will be instructive and useful for microbial  
400 engineering of 'wild' unculturable microbial taxa (Libby & Silver 2019). There are potential commercial  
401 applications for this experimental setup. The consistency of microbial community composition responses  
402 to experimental treatments suggests that this approach may prove quite useful in strategically identifying  
403 sensitive and tolerant taxa along many different real environmental gradients (Rocca *et al.* 2019). Over  
404 time, such information could lead to the development of microbial sensors, in which microbial community  
405 composition could be used to draw inferences about environmental conditions. By better understanding  
406 the resultant microbial community structure and function when microbial worlds collide, we may be able  
407 to better understand and modulate microbial communities in areas as wide as agricultural efficiency by  
408 microbial consortia (Busby *et al.* 2017), bioremediation (Baez-Rogelio *et al.* 2016, Sierocinski *et al.* 2017)  
409 or biomedical microbial transplants (Gibbons *et al.* 2017).

410 Our experiment also raises many new fundamental questions about the environmental and  
411 biotic processes that structure the microbiome. Because we observed compositional shifts at very fine  
412 levels of taxonomic resolution (~sister taxa) for our Marine microbiome when exposed to Brackish  
413 conditions, we speculate that biotic interactions are far more important within this community. Why this  
414 might be is an interesting question for microbial ecology.

415

## 416 **CONCLUSIONS**

417 Our experimental approach to the study of microbial coalescence provides one of the first demonstration  
418 to directly and separately compare the relative strength of environmental and biotic filters in structuring  
419 intact microbial communities. In the case of mixing Fresh and Marine water, the Brackish intermediate  
420 condition proved to be a very strong environmental filter that had a greater effect on the Freshwater  
421 microbiome than its Marine counterpart. Applying this technique to other gradients may reveal cases in  
422 which biotic interactions dominate. Collectively, the use of this approach to detect the phylogenetic  
423 distribution of sensitivity and tolerance to various environmental gradients is likely to help us rapidly  
424 advance our ecological understanding of why microbial taxa live where they do.

425

426



427 **REFERENCES**

- 428 Anderson, M.J. (2001). A new method for non-parametric multivariate analysis of variance. *Austral Ecol.*,  
429 **26**, 32-46.
- 430 Angel, R., Soares, M.I.M., Ungar, E.D. & Gillor, O. (2009). Biogeography of soil archea and bacteria  
431 along a steep precipitation gradient. *ISME J.*, **4**, 553-563.
- 432 Ardón, M., Helton, A.M. & Bernhardt, E.S. (2016). Drought and saltwater incursion synergistically reduce  
433 dissolved organic carbon export from coastal freshwater wetlands. *Biogeochem.*, **127**, 411–426.
- 434 Ardón, M., Morse, J.L., Doyle, M.W. & Bernhardt, E.S. (2016). The Water Quality Consequences of  
435 Restoring Wetland Hydrology to a Large Agricultural Watershed in the Southeastern Coastal  
436 Plain. *Ecosystems*, **13**, 1060-1078.
- 437 Baas, D., Stentiford, G.D., Littlewood, D.T.J. & Hartikainen, H. (2015). Diverse applications of  
438 environmental DNA methods in parasitology. *Trends Parasitol.*, **31**, 499-513.
- 439 Baez-Rogelio, A., Morales-Garcia, Y.E., Quintero-Hernandez, V. & Munoz-Rojas, J. (2016). Next  
440 generation of microbial inoculants for agriculture and bioremediation. *Micro Biotechnol.*, **10**, 19-  
441 21.
- 442 Baldwin, D.S., Rees, G.N., Mitchell, A.M., Watson, G. & Williams, J. (2006). The short-term effects of  
443 salinization on anaerobic nutrient cycling and microbial community structure in sediment from a  
444 freshwater wetland. *Wetlands*, **26**, 455-464.
- 445 Barlow, P.M. & Reichard, E.G. (2010). Saltwater intrusion in coastal regions of North  
446 America. *Hydrogeol J.*, **18**, 247-260.
- 447 Bell, C.W., Fricks, B.E., Rocca, J.D., Steinweg, J.M., McMahon, S.K. & Wallenstein, M.D. (2013). High-  
448 throughput fluorometric measurement of potential soil extracellular enzyme activities. *J Vis Exp.*,  
449 **81**, 50961.
- 450 Bolyen, E., Rideout, J.R., Dillon, M.R., Bokulich, N.A., Abnet, C., Al-Ghalith, G.A. *et al.* (2018). QIIME2:  
451 Reproducible, interactive, scalable, and extensible microbiome data science. *PeerJ.*, e27295v1.
- 452 Bryant, J.A., Lamanna, C., Morlon, H., Kerkhoff, A.J., Enquist, B.J. & Green, J.L. (2008). Microbes on  
453 mountainsides: Contrasting elevational patterns of bacterial and plant diversity. *Proc Natl Acad*  
454 *Sci USA*, **105**, 11505-11511.



- 455 Burke, V. & Baird, L.A. (1931). Fate of fresh water bacteria in the sea. *J. Bacteriol.*, **21**, 287-298.
- 456 Busby, P.E., Soman, C., Wagner, M.R., Friesen, M.L., Kremer, J., Bennett, A. *et al.* (2017). Research  
457 priorities for harnessing plant microbiomes in sustainable agriculture. *PLoS Biol.*, **15**, e2001793.
- 458 Cadotte, M.W. & Tucker, C.M. (2017). Embracing the Nonindependence of the Environmental Filter: A  
459 Reply to Responses. *Trends Ecol Evol.*, **32**, 886-887.
- 460 Cahill, J.F., Kembel, S.W., Lamb, E.G. & Keddy, P.A. (2008). Does phylogenetic relatedness influence  
461 the strength of competition among vascular plants? *Perspect Plant Ecol Syst.*, **10**, 41-50.
- 462 Callahan, B.J., McMurdie, P.J. & Holmes, S.P. (2017). Exact sequence variants should replace  
463 operational taxonomic units in marker-gene data analysis. *ISME J.*, **11**, 2639-2643.
- 464 Canfora, L., Bacci, G., Pinzari, F., Lo Papa, G., Dazzi, C. & Benedetti, A. (2014). Salinity and bacterial  
465 diversity: to what extent does the concentration of salt affect the bacterial community in a saline  
466 soil? *PLoS One.*, **9**, e106662.
- 467 Caporaso, J.G., Lauber, C.L., Walters, W.A., Berg-Lyons, D., Lozupone, C.A., Turnbaugh, P.J. *et al.*  
468 (2011). Global patterns of 16S rRNA diversity at a depth of millions of sequences per sample.  
469 *Proc Natl Acad Sci USA.*, **108**, 4516–4522.
- 470 Comte, J., Berga, M., Severin, I., Logue, J.B. & Lindstrom, E.S. (2017). Contribution of different bacterial  
471 dispersal sources to lakes: Population and community effects in different seasons. *Env*  
472 *Microbiol.*, **19**, 2391–2404.
- 473 Craft, C., Clough, J., Ehman, J., Joye, S., Park, R., Pennings, S. *et al.* (2009). Forecasting the effects  
474 of accelerated sea-level rise on tidal marsh ecosystem services. *Front Ecol Environ*, **7**, 73-78.
- 475 del Giorgio, P.A. & Bouvier, T.C. (2002). Linking the physiologic and phylogenetic successions in free-  
476 living bacterial communities along an estuarine salinity gradient. *Limnol Oceanogr.*, **47**, 471-  
477 486.
- 478 Edmonds, J.W., Weston, N.B., Joye, S.B., Mou, X. & Moran, M.A. (2009). Microbial community response  
479 to seawater amendment in low-salinity tidal sediments. *Microb Ecol.*, **58**, 558–568.
- 480 Ewert, M. & Deming, J.W. (2013). Sea Ice Microorganisms: Environmental Constraints and Extracellular  
481 Responses. *Biology*, **2**, 603-628.

- 482 Fierer, N. & Jackson, R.B. (2006). The diversity and biogeography of soil bacterial communities. *Proc*  
483 *Natl Acad Sci USA*, **103**, 626-631.
- 484 Gibbons, S.M., Kearney, S.M., Smilie, C.S. & Alm, E.J. (2017). Two dynamic regimes in the human gut  
485 microbiome. *PLOS Comput Biol.*, **13**, e1005364.
- 486 Goberna, M., Navarro-Cano, J.A., Valiente-Banuet, A., García, C. & Verdú, M. (2014). Abiotic stress  
487 tolerance and competition-related traits underlie phylogenetic clustering in soil bacterial  
488 communities. *Ecol Lett.*, **17**, 1191-1201.
- 489 Grime, J.P. (1977). Evidence for the existence of three primary strategies in plants and its relevance to  
490 ecological and evolutionary theory. *Am. Nat.*, **111**, 1169-1194.
- 491 Hawkes, C.V., Waring, B.G., Rocca, J.D. & Kivlin, S.N. (2017). Historical climate controls soil respiration  
492 responses to current soil moisture. *Proc Natl Acad Sci USA*, **114**, 6322-6327.
- 493 Herbert, E.R., Boon, P., Burgin, A.J., Neubauer, S.C., Franklin, R.B., Ardón, M. *et al.* (2015). A global  
494 perspective on wetland salinization: ecological consequences of a growing threat to freshwater  
495 wetlands. *Ecosphere.*, **6**, 1-43.
- 496 Herlemann, D.P.R., Labrenz, M., Jürgens, K., Bertilsson, S., Waniek, J.J. & Andersson, A.F. (2011).  
497 Transitions in bacterial communities along the 2000 km salinity gradient of the Baltic Sea. *ISME*  
498 *J.*, **5**, 1571-1579.
- 499 Herlemann, D.P.R., Lundin, D., Andersson, A.F., Labrenz, M. and Jürgens, K. (2016). Phylogenetic  
500 signals of salinity and season in bacterial community composition across the salinity gradient of  
501 the Baltic Sea. *Front Microbiol.*, **7**.
- 502 Jackson, C.R. & Vallaire, S.C. (2009). Salinity and nutrients on microbial assemblages in Louisian  
503 wetland sediments. *Wetlands*, **29**, 277-287.
- 504 Jackson, D.A. (1995). PROTEST: A PROcrustean randomization TEST of community environment  
505 concordance. *Ecoscience*, **3**, 297-303.
- 506 Jousset, A., Bienhold, C., Chatzinotas, A., Gallien, L., Gobet, A., Kurm, V. *et al.* (2017). Where less may  
507 be more: how the rare biosphere pulls ecosystems strings. *ISME J*, **11**, 853-862.
- 508 Lennon, J.T. & Jones S.E. (2011). Microbial seed banks: the ecological and evolutionary implications of  
509 dormancy. *Nat Rev Microbiol*, **9**, 119-130.

- 510 Leibold, M.A., Holyoak, M., Mouquet, N., Amarasekare, P., Chase, J.M., Hoopes, M.F. *et al.* (2004). The  
511 metacommunity concept: a framework for multi-scale community ecology. *Ecol Lett.*, **7**, 601-  
512 613.
- 513 Libby, E.A. & Silver, P.A. (2019). Harnessing undomesticated life. *Nat Rev Microbiol.*, **4**, 212-213.
- 514 Livingston, G., Jiang, Y., Fox, J.W. & Leibold, M.A. (2013). The dynamics of community assembly under  
515 sudden mixing in experimental microcosms. *Ecology*, **94**, 2898–2906.
- 516 Lozupone, C.A. & Knight, R. (2017). Global patterns in bacterial diversity. *Proc Natl Acad Sci USA*, **104**,  
517 11436-11440.
- 518 Luef, B., Frischkorn, K.R., Wrighton, K.C., Holman, H.Y.N., Birarda, G., Thomas, B.C. *et al.* (2015).  
519 Diverse uncultivated ultra-small bacterial cells in groundwater. *Nat Commun*, **6**, 6372.
- 520 Mansour, I., Heppel, C.M., Ryo, M. & Rillig, M.C. (2018). Application of the microbial community  
521 coalescence concept to riverine networks. *Biol Rev.*, **93**, 1832-1845.
- 522 Mirarab, S., Nguyen, N., Guo, S., Wang, L., Kim, J. & Warnow, T. (2014). PASTA: Ultra-Large Multiple  
523 Sequence Alignment for Nucleotide and Amino-Acid Sequences. *J Comp Biol*, **22**, 377-386.
- 524 Nagler, M., Podmirseg, S.M., Griffith, G.W., Insam, H. & Ascher-Jenull, J. (2018). The use of  
525 extracellular DNA as a proxy for specific microbial activity. *Appl Microbiol Biotech.*, **102**, 2885-  
526 2898.
- 527 Nielsen, D.L., Brock, M.A., Rees, G.N. & Baldwin, D.S. (2003). Salinity and bacterial diversity: to what  
528 extent does the concentration of salt affect the bacterial community in a saline soil? *Aust J Bot.*,  
529 **51**, 655-665.
- 530 Neubauer, S.C., Franklin, R.B. & Berrier, D.J. (2013). Saltwater intrusion into tidal freshwater marshes  
531 alters the biogeochemical processing of organic carbon. *Biogeosci.*, **10**, 8171-8183.
- 532 Oksanen, J., Blanchet, F.G., Friendly, M., Kindt, R., Legendre, P., McGlenn, D. *et al.* (2017). Vegan:  
533 Community Ecology Package. R package version 2.4-3.
- 534 Parte, A.C. (2013). LPSN – list of prokaryotic names with standing in nomenclature. *Nucleic Acids*  
535 *Research*, **42**, D613-D616.

- 536 Paver, S.F., Muratore, D.J., Newton, R.J. & Coleman, M.L. (2018). Re-evaluating the salty divide:  
537 phylogenetic specificity of transitions between marine and freshwater systems. *mSystems.*, **3**,  
538 e00232-18.
- 539 Pembrey, R.S., Marshall, K.C. & Schneider, R.P. (1999). Cell surface analysis techniques: What do cell  
540 preparation protocols do to cell surface properties? *Appl Environ Microbiol*, **65**, 2877-2894.
- 541 Peterson, B.W., Sharma, P.K., van der Mei, H.C. & Busscher, H.J. (2012). Bacterial cell surface damage  
542 due to centrifugal compaction. *Appl Environ Microbiol*, **78**, 120-125.
- 543 Quast, C., Pruesse, E., Yilmaz, P., Gerken, J., Schweer, T. & Yarza, P. *et al.* (2013). The SILVA  
544 ribosomal RNA gene database project: improved data processing and web-based tools. *Nucleic  
545 Acids Res.*, **41**, D590-D596.
- 546 R Development Core Team. (2010). R: a Language and Environment for Statistical Computing. R  
547 Foundation for Statistical Computing, Vienna, Austria.
- 548 Rillig, M.C., Antonovics, J., Caruso, T., Lehmann, A., Powell, J.R., Veresoglou, S.D. *et al.* (2015).  
549 Interchange of entire communities: microbial community coalescence. *Trends Ecol Evol.*, **8**,  
550 470-476.
- 551 Rillig, M.C. & Mansour, I. (2017) Microbial Ecology: Community Coalescence Stirs Things Up. *Curr Biol.*,  
552 **27**, R1268-R1286.
- 553 Rocca, J.D., Simonin, M., Blaszcak, J.R., Ernakovich, J.G., Gibbons, S.M., Midani, F.S., *et al.* (2019).  
554 The Microbiome Stress Project: Toward a Global Meta-Analysis of Environmental Stressors and  
555 Their Effects on Microbial Communities. *Front Microbiol.*, **9**, 3272.
- 556 Sierocinski, P., Milferstedt, K., Bayer, F., Alston, M., Swarbreck, D., Hobbs, P.J. *et al.* (2017). The most  
557 efficient microbial community dominates during community coalescence. *Curr Biol.*, **27**, 3390–  
558 3395.
- 559 Siles, J.A. & Margesin, R. (2016). Abundance and Diversity of Bacterial, Archaeal, and Fungal  
560 Communities Along an Altitudinal Gradient in Alpine Forest Soils: What Are the Driving Factors?  
561 *Microb Ecol.*, **72**, 207-220.
- 562 Sokal, R. & Michener, C. (1958). *A statistical method for evaluating systematic relationships*. Univ Press  
563 of Kansas, 38: 1409-1438.

- 564 Souffreau, C., Pecceu, B., Denis, C., Rummens, K. & Meester, L.D. (2014). An experimental analysis of  
565 species sorting and mass effects in freshwater bacterioplankton. *Freshwater Biol.*, **10**, 2081-  
566 2095.
- 567 Vellend, M. (2010). Conceptual synthesis in community ecology. *Q Rev Biol.*, **85**, 183-206.
- 568 Wang, Y., Hatt, J.K., Tsementzi, D., Rodriguez-R, L.M., Ruiz-Pérez, C.A., Weigand, M.R. *et al.* (2017).  
569 Quantifying the Importance of the Rare Biosphere for Microbial Community Response to  
570 Organic Pollutants in a Freshwater Ecosystem. *Appl Environ Microbiol.*, **83**, e03321.
- 571 Washburne, A.D., Silverman, J.D., Leff, J.W., Bennett, D.J., Mukherjee, S. *et al.* (2017). Phylogenetic  
572 factorization of compositional data yields lineage-level associations in microbiome datasets.  
573 *PeerJ*, **5**, e2969.
- 574 Washburne, A.D., Silverman, J.D., Morton, J.T., Becker, D., Crowley, D., Mukherjee, S. *et al.* (2019).  
575 Phylofactorization – a graph partitioning algorithm to identify phylogenetic scales of ecological  
576 data. *Ecol Monogr.*, in press (accepted).
- 577 Webb, S.D. (1976). Mammalian Faunal Dynamics of the Great American Interchange. *Paleobiology*, **2**,  
578 220–234.
- 579 Weston, N.B., Dixon, R. & Joye, S.B. (2006). Microbial and geochemical ramifications of salinity intrusion  
580 into tidal freshwater sediments. *J. Geophys Res: Biogeosci.*, **111**, G01009.
- 581 Whittaker, R.H. (1965). Dominance and diversity in land plant communities. *Science*, **147**, 250-260.
- 582 Wu, Q.L., Zwart, G., Schauer, M., Kamst-van Agterveld, M.P. & Hahn, M.W. (2006). Bacterioplankton  
583 community composition along a salinity gradient of sixteen high-mountain lakes located on the  
584 Tibetan Plateau, China. *Appl Environ Microbiol.*, **72**, 5478-5485.
- 585 Yang, Y., Gao, Y., Wang, S., Xu, D., Yu, H., Wu, L. *et al.* (2014). The microbial gene diversity along an  
586 elevation gradient of the Tibetan grassland. *ISME J.*, **8**, 430-440.

587 **TABLE & FIGURE LEGENDS**

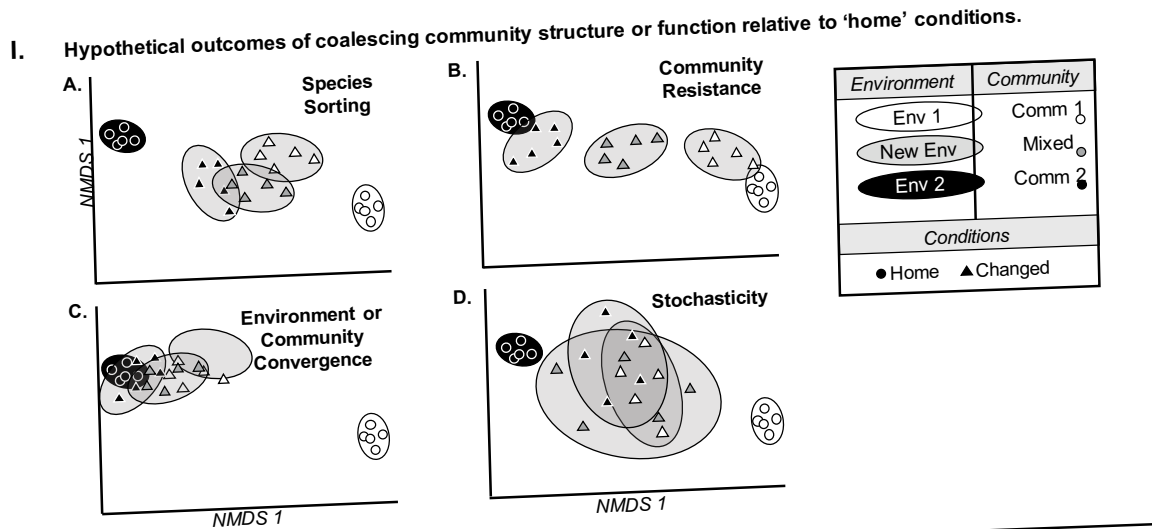

**Approach to *directly* parse the contribution of community assembly mechanisms in community coalescence**

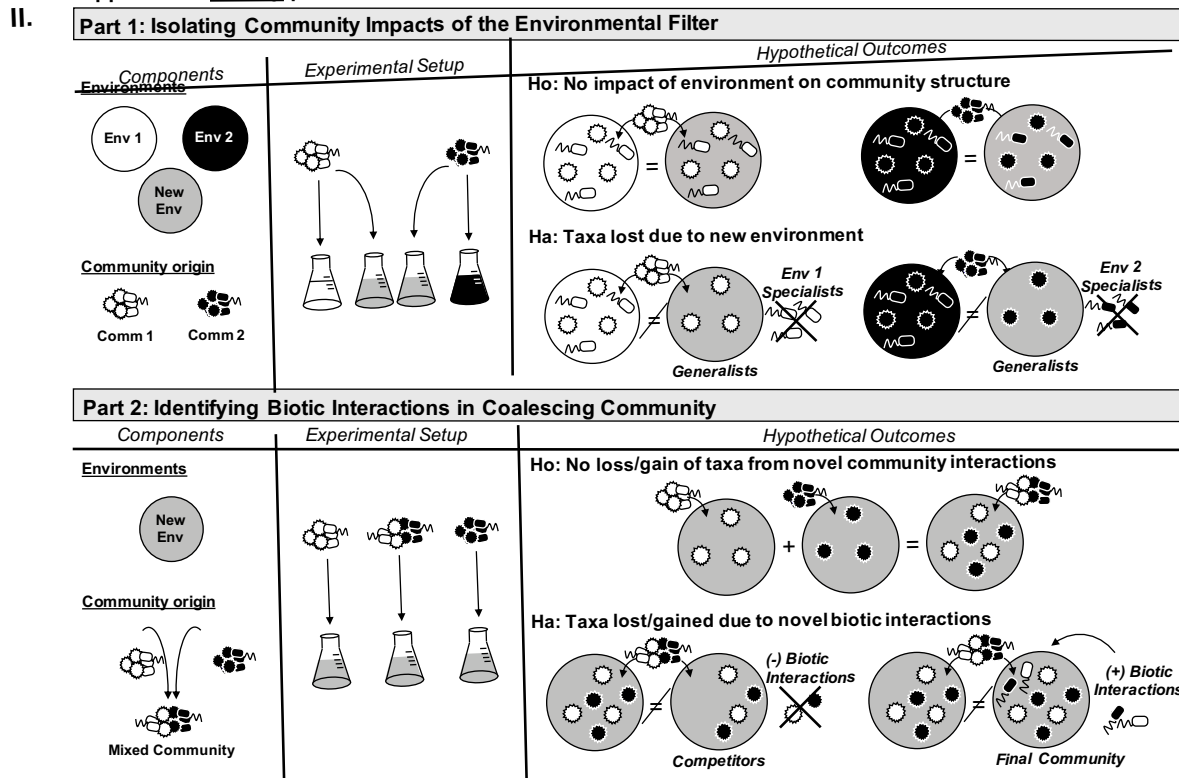

588

589 **Figure 1. (I.) Potential outcomes of coalescing communities relative to “home” conditions.**

590 Ellipsoids represent the theoretical variation in community structure or function among experimental  
 591 replicates (symbols). Communities may be symmetrically impacted by coalescence (A,B), constrained  
 592 primarily by environment (A), or resistant to environmental change (B); (C) asymmetrical impact may be  
 593 driven by either environment or community; or (D) coalescence may result in stochastic shifts in  
 594 community structure or function. **(II.) Conceptual framework to disentangle the influence of**

595 **assembly processes:** components needed for each filter (left), experimental setup (center), and  
 596 hypothetical outcomes (right). Top panel: assessing the impact of the environmental filter, where no  
 597 impact of altered environment (Ho), versus a shift in community structure (Ha), reveals environmentally  
 598 sensitive and generalist taxa. Bottom panel determines the impact of novel biotic interactions, with no  
 599 impact (Ho) where the sum of Part 1 communities equals that of the coalesced community, versus new  
 600 biotic interactions, where taxa are lost due to competition or gained due to mutualistic interactions (Ha).  
 601

602 **Table 1.** Location, chemical and microbial bulk characterization of the two distinct aquatic endmember  
 603 habitats in Coastal North Carolina, USA: Freshwater and Marine environments and inocula; and the  
 604 chemical characterization of the experimentally mixed (1:1) Brackish environment and blended  
 605 inoculum.

| <i>Environment</i>                         | <i>Freshwater</i>      | <i>Brackish</i>           | <i>Marine</i>    |
|--------------------------------------------|------------------------|---------------------------|------------------|
| <i>Endpoint Location</i>                   | Timberlake Restoration | Lab mixed 50:50 by volume | Cape Hatteras NS |
| Latitude,                                  | 35°53'46.4"N,          | —                         | 35°49'57.4"N,    |
| Longitude                                  | 76°09'51.4"W           | —                         | 75°33'25.7"W     |
| Mixing                                     | Episodic/Storm         | —                         | Turbulent        |
| Temp (June '16)                            | 23-25 °C               | —                         | 23 °C            |
| <i>Chemistry of Environments</i>           |                        |                           |                  |
| pH                                         | 4.4 (± 0.05)           | 7.8 (± 0.01)              | 8.2 (± 0.01)     |
| Salinity (mS/cm)                           | 0.07 (± 0.01)          | 26.7 (± 0.9)              | 51.8 (± 0.4)     |
| Dissolved Organic Carbon (mg/L)            | 33.9 (± 1.2)           | 21.7 (± 3.2)              | 3.6 (± 0.4)      |
| Dissolved Inorganic Nitrogen (mg/L)        | 0.92 (± 0.01)          | 0.61 (± 0.05)             | 0.12 (± 0.03)    |
| <i>Microbial Inoculum Characterization</i> |                        |                           |                  |
| Biomass (ng DNA/μL)                        | 749.7                  | 584.8                     | 218.3            |

606

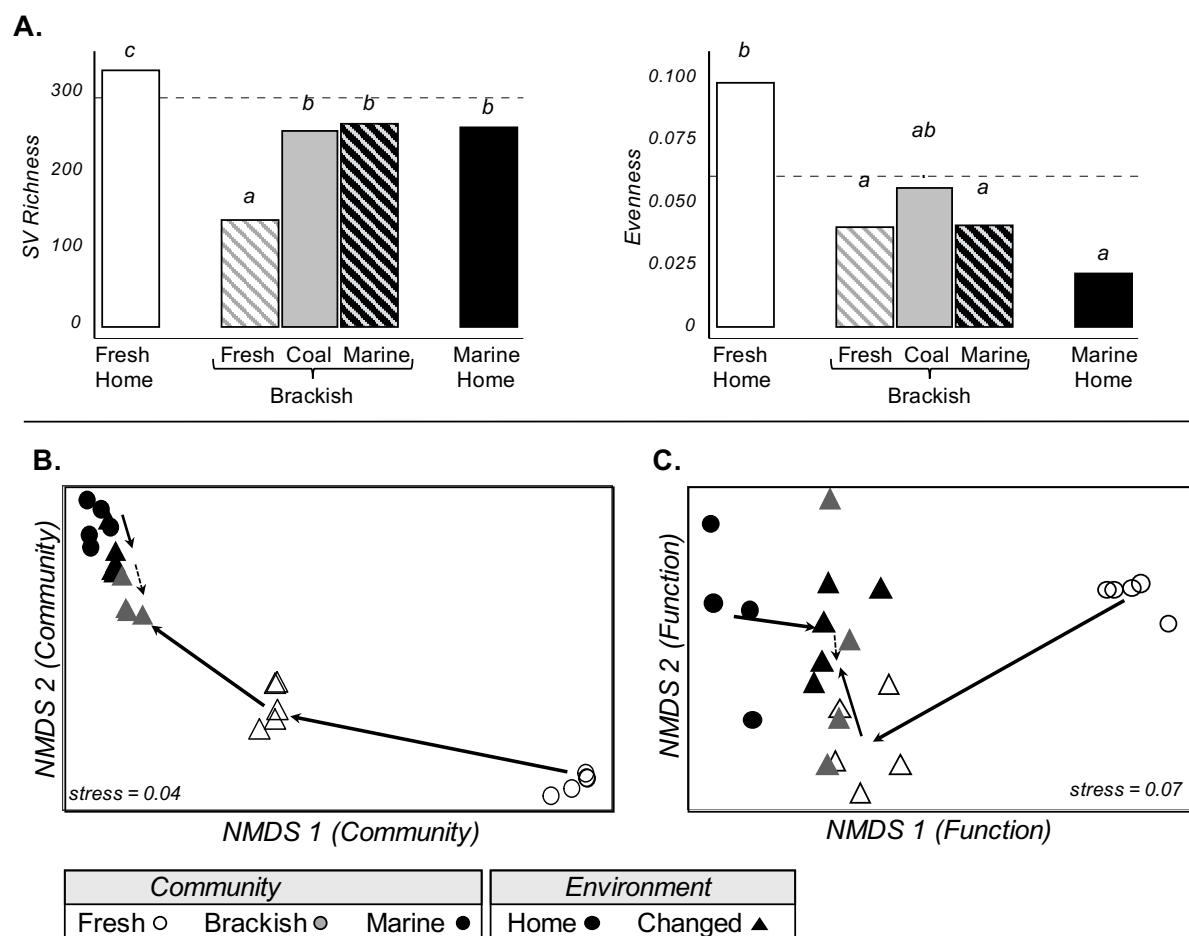

607  
 608 **Figure 2. Impact of coalescence on microbial community structure and function:** (A) alpha  
 609 diversity of each treatment for SV richness (left) and Pielou's Evenness (right), (B,C) nonmetric  
 610 multidimensional scaling (NMDS) of (B) bacterial community structure; and (C) microbial extracellular  
 611 enzyme activity. The NMDS arrows indicate movement through the filters relative to endmember control  
 612 conditions, weighted by significance from Adonis (solid = significant change; dotted = NS). No  
 613 community or functional data is available for one Brackish-Coalescent sample that was damaged during  
 614 the incubation (n=4, instead of experiment wide n=5).



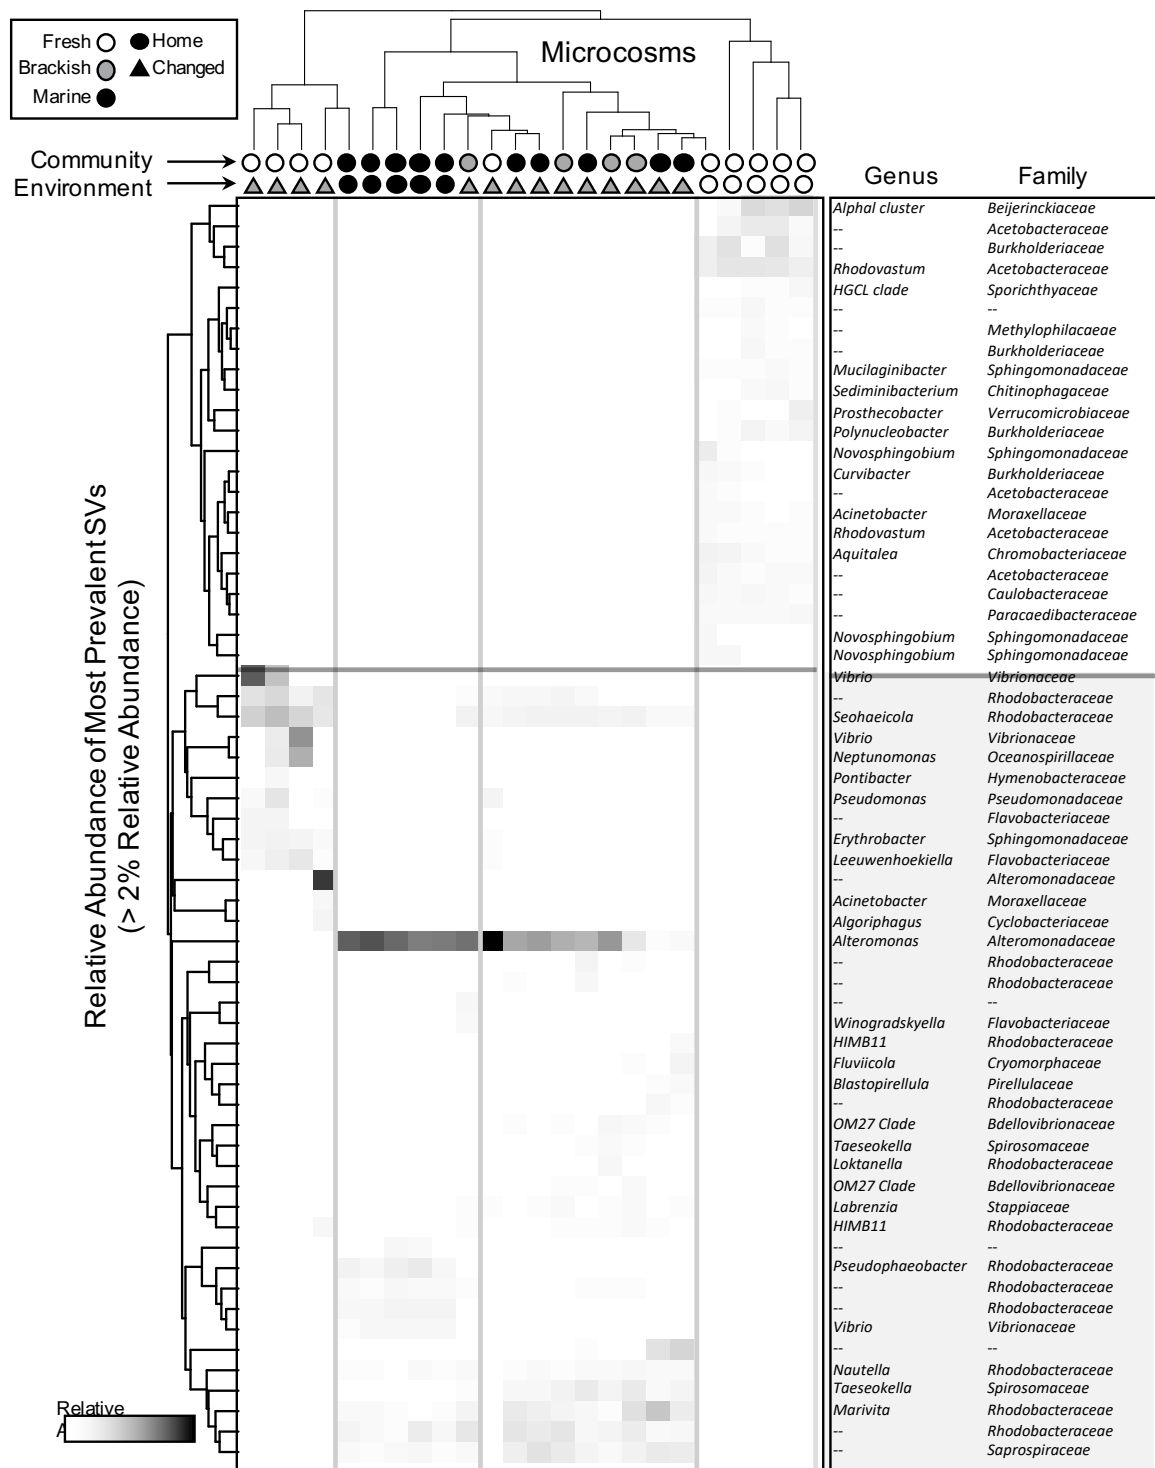

615

616 **Figure 3. Responses of the most abundant bacteria to community coalescence.** Heatmap of the

617 most prevalent bacterial SVs (>0.5% relative abundance among all microcosms), vertically clustered by

618 SV, with corresponding taxonomy (shaded by salt tolerance) and horizontally by microcosm, identified

619 by Environment (top row symbols) and Inoculum (bottom row). Blue and green flanked regions identify

620 the “home” conditions for Freshwater and Marine conditions. Ranking estimated using standard UPGMA

621 methods based on Bray-Curtis pairwise dissimilarities in Vegan R package.

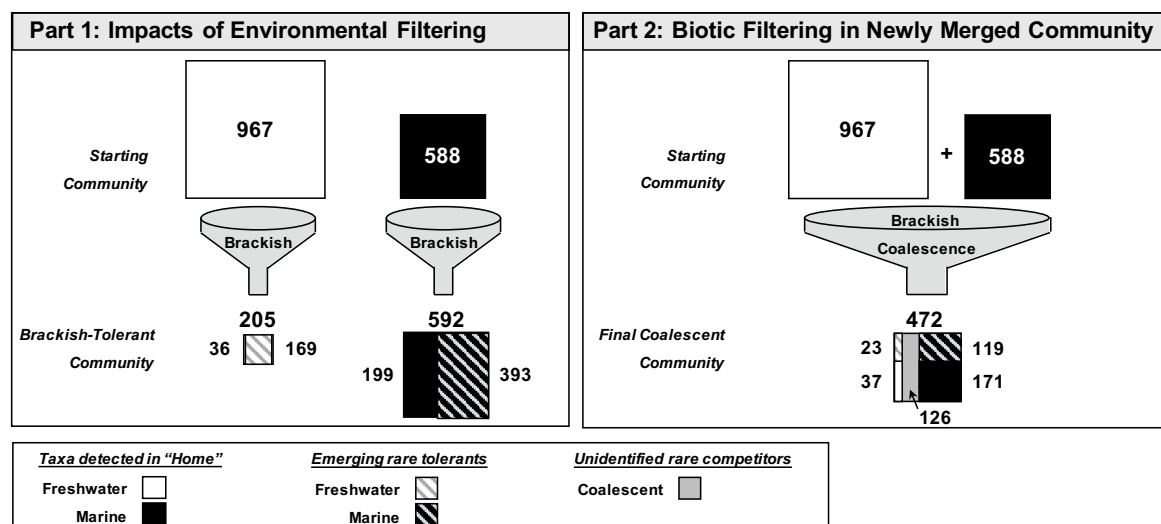

622

623

624 **Figure 4.** Distribution of community origin due to each assembly filter: microbial taxa lost and gained  
 625 due to Brackish exposure (Part 1: Impacts of Environmental Filtering); and due to microbiome merging  
 626 with the Brackish-Coalescence treatments (Part 2: Biotic Filtering In Newly Merged Community). The  
 627 numbers inside or above each box represent the number of taxa (SVs) found among the microcosms of  
 628 that treatment (n=5), with Freshwater in "white" and Marine in "Black" boxes. The numbers adjacent to  
 629 the lower boxes represent the number of taxa detected in the original communities (solid) or detected  
 630 as rare taxa emergence (striped), and the gray box represents rare emergence of unknown endmember  
 631 origin.

632

633

634

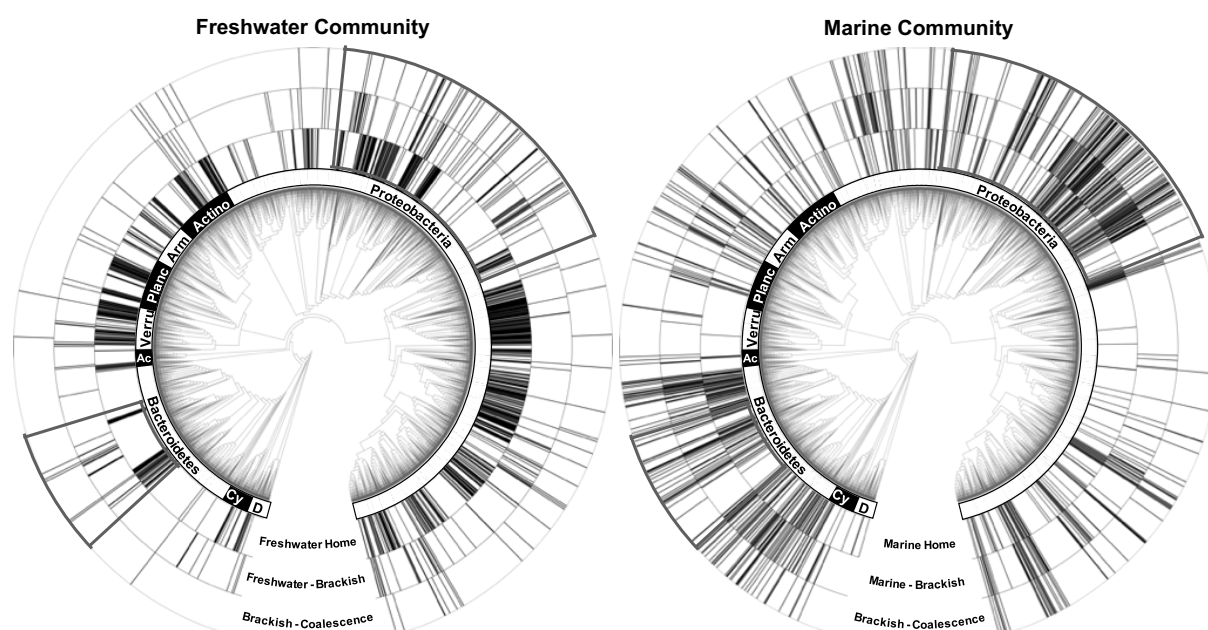

635  
636 **Figure 5.** Community phylogenetic response to environmental filtering and to novel biotic interactions  
637 for Freshwater (left) and Marine (right) microbiomes. The *inner ring* shows the distribution of microbial  
638 taxa present in “home” conditions; *middle ring* represents the distribution of microbial taxa surviving the  
639 Brackish environment; and the *outer ring* displays the microorganisms of known origin surviving to  
640 Brackish-Coalescence. The gray boxes highlight phylogenetic regions where the Freshwater and Marine  
641 microbiomes exhibit distinct dispersion signals in response to the assembly filters. *The bacterial phyla*  
642 *are labeled inside the rings, with the following abbreviations ‘Actino’: Actinobacteria; ‘Arm’:*  
643 *Armatimonadetes; ‘Planc’: Planctomycetes; ‘Verru’: Verrucomicrobia; ‘Ac’: Acidobacteria; ‘Cy’:*  
644 *Cyanobacteria; ‘D’: Dependitiae.*

645 **SUPPLEMENTARY INFORMATION**

**Manipulated Microcosms**

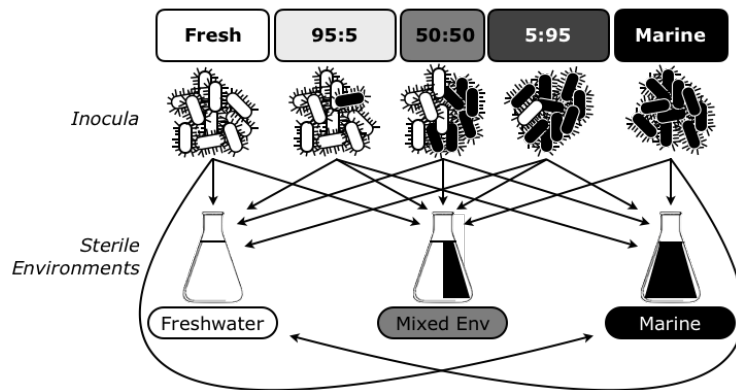

**Field Controls, Lab Controls**

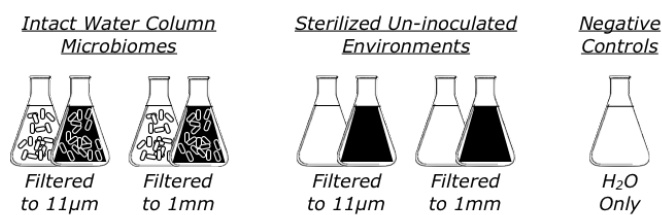

646

647 **Supplemental Figure 1.** Laboratory Experimental Incubation Setup. (Top) Reciprocal manipulation of  
 648 communities into 'home', 'away' and 'mixed' environments, with and without community mixing. (Bottom)  
 649 Field controls of: (Left) Intact communities with two levels of filtration to assess microbes-only and  
 650 microbes + small predators; (Middle) Sterile environments of same filtration; (Right) Water-only negative  
 651 controls. Replication is five microcosms per treatment.

652

653

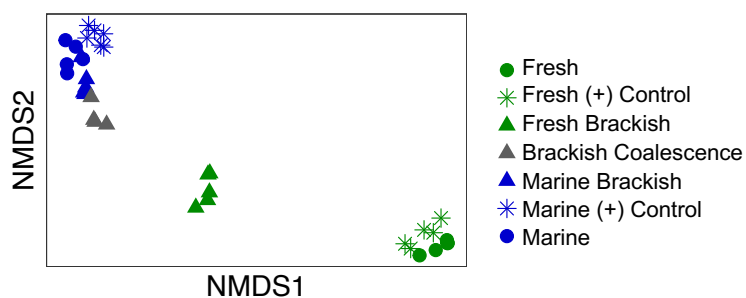

654

655 **Supplemental Figure 2.** Nonmetric multidimensional scaling (NMDS) of bacterial community structure,  
 656 demonstrating the minimal impacts of inoculum preparations and autoclaving environments on microbial  
 657 community structure relative to unaltered positive control microcosms.

658

659

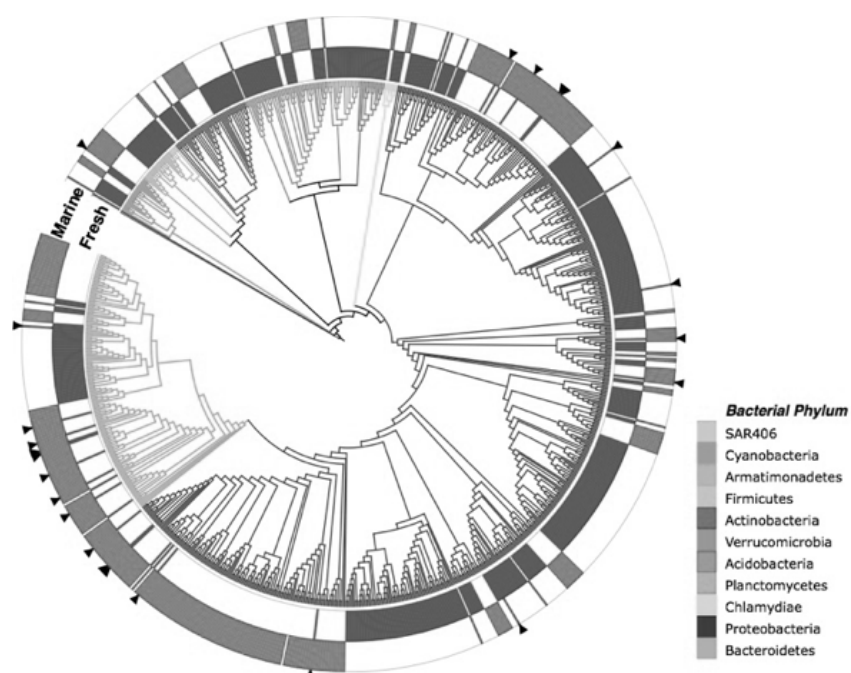

660

661

662 **Supplemental Figure 3.** 16S rRNA-based phylogeny of bacteria in the starting inocula. The inner ring

663 shows SVs in the Freshwater inocula (green) and outer ring represents the Marine inocula (blue). Black

664 arrows indicate the 21 overlapping SVs.

665

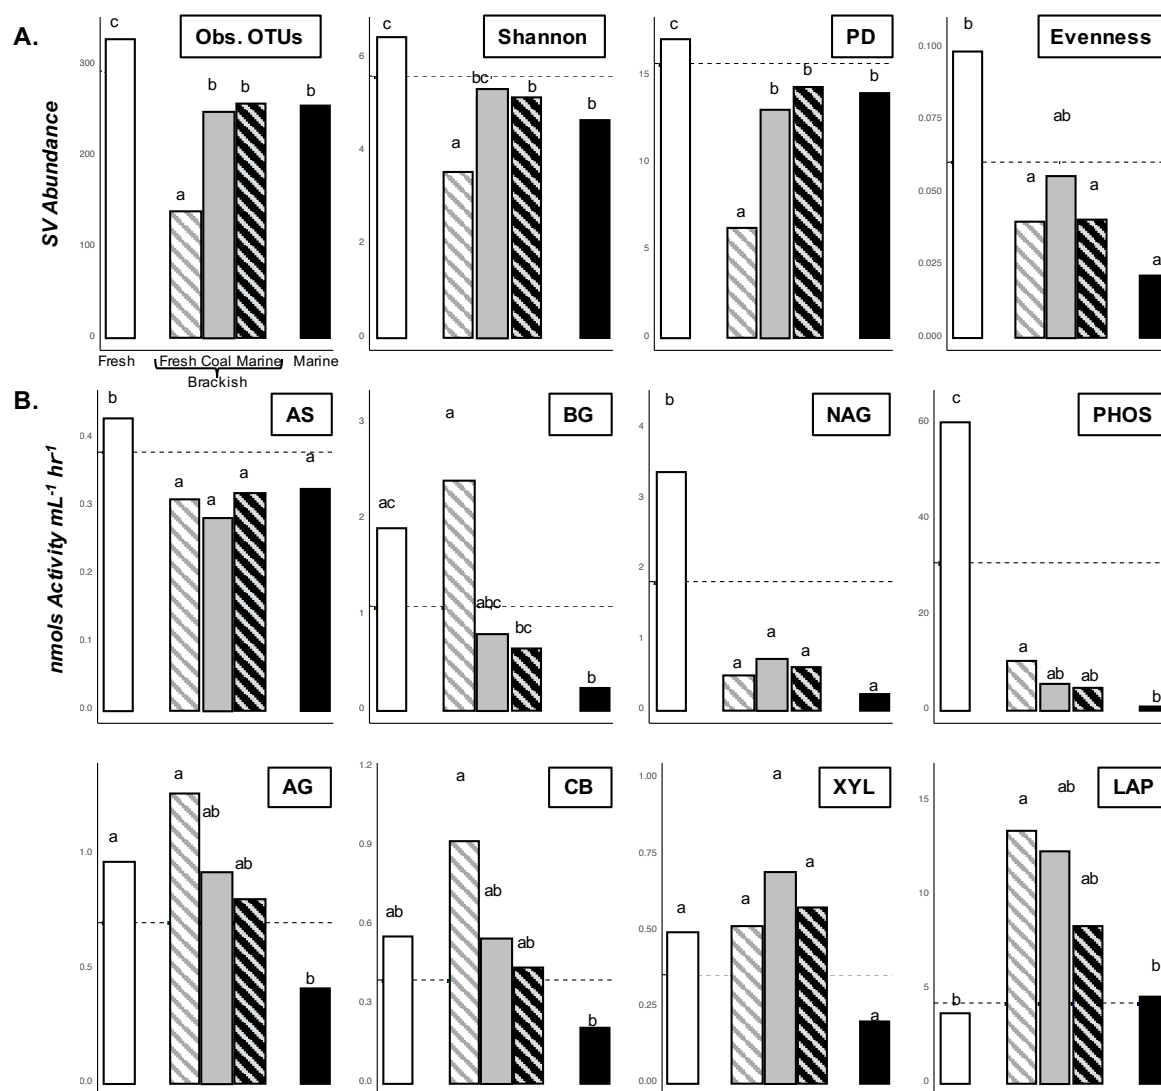

666  
 667 **Supplemental Figure 4.** Microbial function of Coalescing Microbial Communities vs. End member  
 668 Controls. Barcharts of potential extracellular enzyme activity: (A) Aryl-sulfatase, (B) 1,4 Beta-  
 669 glucosidase, (C) 1,4 N-acetylglucosidase, (D) Alkaline Phosphotase, (E) 1,4 Alphaglucosidase, (F) 1,4  
 670 Cellobiohydrolase, (G) D-xylosidase, and (H) L-leucine-aminopeptidase. Compact letter display  
 671 represents pairwise comparisons among each of the five treatments, dotted lines denote the average of  
 672 the end-point controls (Freshwater and Marine), and error bars display  $\pm$ SE of each enzyme.  
 673

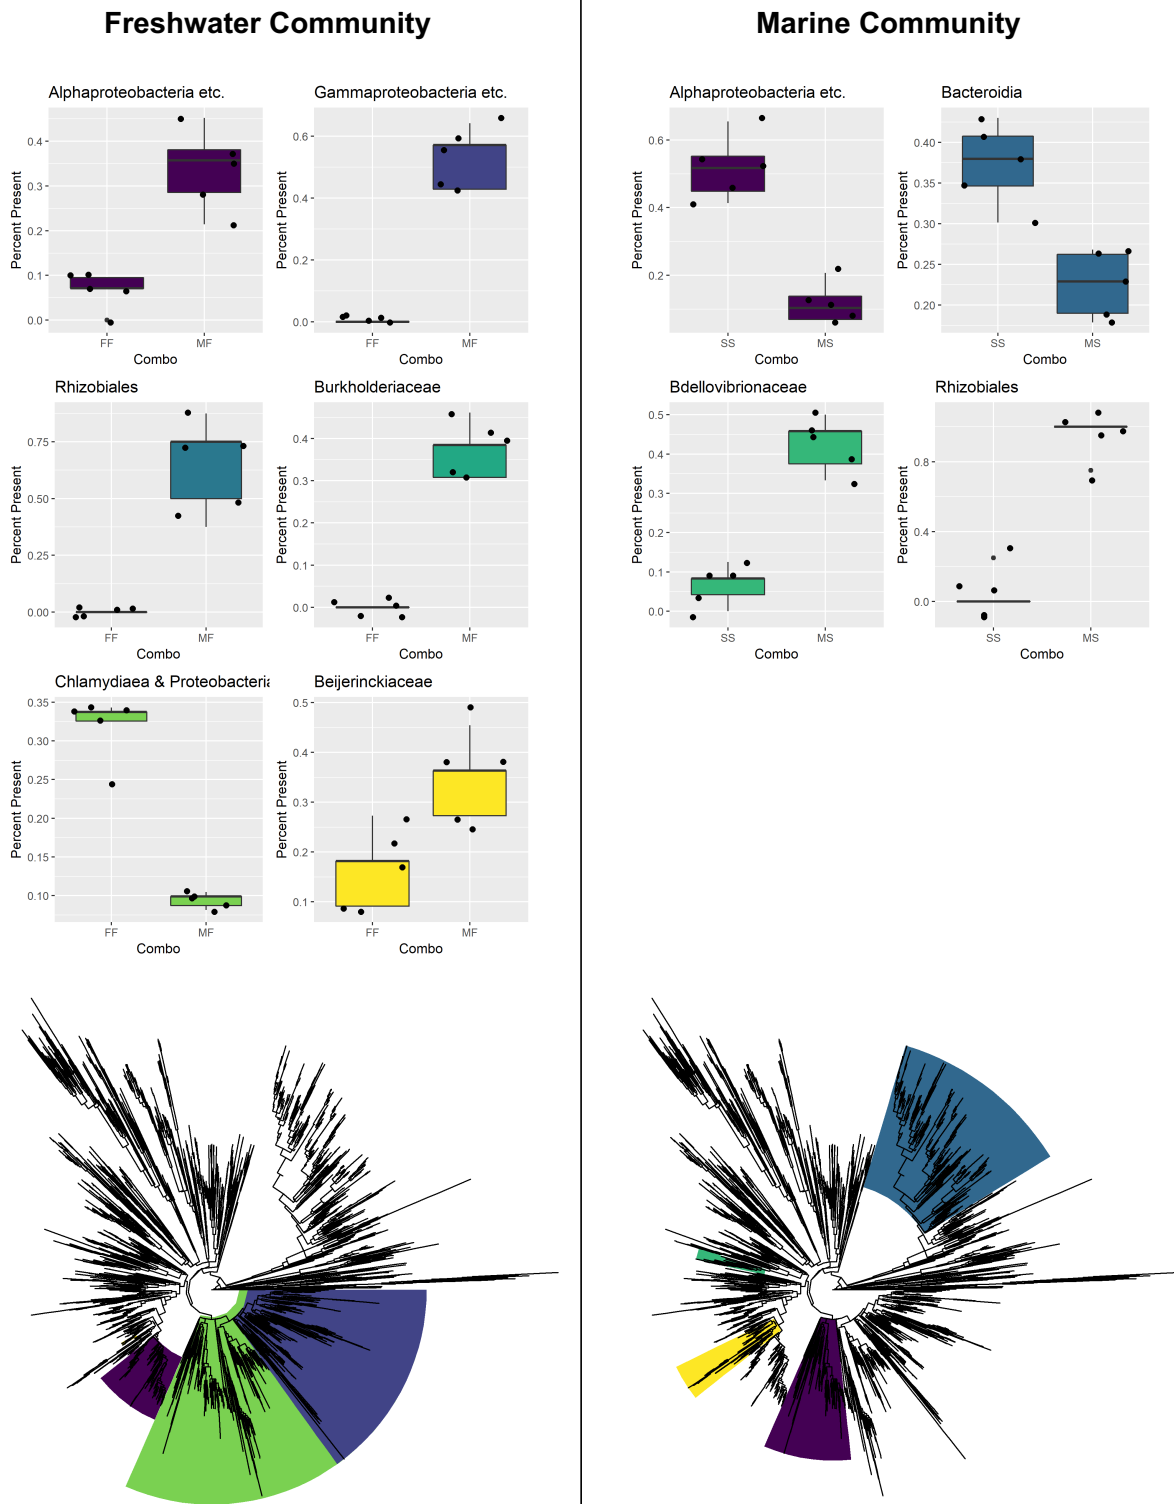

674

675 **Supplemental Figure 5.** Phylofactorization results for Brackish exposure on the Freshwater (Left) and  
676 Marine (Right) microbiomes. Top panels show the non-overlapping clades identified as significantly  
677 factors based on a Holm's sequentially rejective 5% FWER cutoff, and bottom panels represent the  
678 corresponding phylogenetic location for each of these factors (6 in Freshwater, 4 in Marine).
